# Supplementary material
Source: PubMed Central journal article supplement (PMC5818041)
Supplement: supp_9_2_e010909_.pdf [file supp_9_2_e010909_.pdf]

## Supplementary Online Content

**eTable 1:** Characteristics of Included Studies Using the Modified Newcastle–Ottawa Scale for Assessing the Quality of the Non-Randomized Studies

**eTable 2:** Characteristics of Included Studies Using the Modified Newcastle–Ottawa Scale for Assessing the Quality of the Cross-Sectional Studies

**eTable 3:** Summary of Critical Appraisal of Included Studies Using the Newcastle–Ottawa Scale for Assessing the Quality of Observational Studies

**eTable 4:** Adjustment factors, Validation of Measurement, and Assessment of Outcomes for Included Studies

**eTable 5:** Leave-one-out Analysis for Coronary Heart Disease, Stroke, Metabolic Syndrome and Type 2 Diabetes

**eFigure 1:** White rice consumption and coronary heart disease and type 2 diabetes mellitus in Western countries

**eMethods:** Search Strategies

**eTable 1:** Characteristics of Included Studies Using the Modified Newcastle–Ottawa Scale for Assessing the Quality of the Non-Randomized Studies

| Study, year           | Selection                                                                              |                                                                                                                                         |                                                                         |                                                                                                                           | Comparability                                                                                                               | Outcome                                                                 |                                                 |                                                                                                                                                              |
|-----------------------|----------------------------------------------------------------------------------------|-----------------------------------------------------------------------------------------------------------------------------------------|-------------------------------------------------------------------------|---------------------------------------------------------------------------------------------------------------------------|-----------------------------------------------------------------------------------------------------------------------------|-------------------------------------------------------------------------|-------------------------------------------------|--------------------------------------------------------------------------------------------------------------------------------------------------------------|
|                       | Representativeness of the exposed cohort truly the general population in the community | Selection of the non exposed cohort from the same community as the exposed cohort (drawn from the same community as the exposed cohort) | Ascertainment of exposure (validated questionnaire or measurement tool) | Demonstration that outcome of interest was not present at start of study (no CHD, stroke, T2DM or MetS at start of study) | Comparability of cohorts on the basis of the design or analysis (study controls for gender and cardiovascular risk factors) | Assessment of outcome (physician's diagnosis OR objective measurements) | Was follow-up long enough for outcomes to occur | Adequacy of follow up of cohorts (completed or loss follow up < 20%) or (The statistical test used to analyze the data is clearly described and appropriate) |
| Muraki et al, 2015    | ✓                                                                                      | ✓                                                                                                                                       | ✓                                                                       | ✓                                                                                                                         | ✓✓                                                                                                                          | ✓                                                                       | ✓                                               | ✓                                                                                                                                                            |
| Dong et al, 2015      | ✓                                                                                      | ✓                                                                                                                                       |                                                                         | ✓                                                                                                                         | ✓                                                                                                                           | ✓                                                                       | ✓                                               | ✓                                                                                                                                                            |
| Eshak et al, 2014     | ✓                                                                                      | ✓                                                                                                                                       | ✓                                                                       |                                                                                                                           | ✓                                                                                                                           | ✓                                                                       | ✓                                               | ✓                                                                                                                                                            |
| Bahadoran et al, 2014 | ✓                                                                                      | ✓                                                                                                                                       | ✓                                                                       | ✓                                                                                                                         | ✓✓                                                                                                                          | ✓                                                                       | ✓                                               | ✓                                                                                                                                                            |
| Yu, 2013              | ✓                                                                                      | ✓                                                                                                                                       | ✓                                                                       |                                                                                                                           | ✓✓                                                                                                                          | ✓                                                                       | ✓                                               |                                                                                                                                                              |
| Soriguer et al, 2013  | ✓                                                                                      | ✓                                                                                                                                       | ✓                                                                       | ✓                                                                                                                         | ✓                                                                                                                           | ✓                                                                       | ✓                                               |                                                                                                                                                              |
| Eshak et al, 2011     | ✓                                                                                      | ✓                                                                                                                                       | ✓                                                                       | ✓                                                                                                                         | ✓✓                                                                                                                          | ✓                                                                       | ✓                                               | ✓                                                                                                                                                            |
| Yu et al, 2011        |                                                                                        |                                                                                                                                         | ✓                                                                       | ✓                                                                                                                         | ✓                                                                                                                           | ✓                                                                       | ✓                                               |                                                                                                                                                              |
| Liang et al, 2010     | ✓                                                                                      | ✓                                                                                                                                       | ✓                                                                       | ✓                                                                                                                         | ✓✓                                                                                                                          |                                                                         |                                                 | ✓                                                                                                                                                            |
| Oba et al, 2010       |                                                                                        | ✓                                                                                                                                       | ✓                                                                       | ✓                                                                                                                         | ✓✓                                                                                                                          |                                                                         | ✓                                               | ✓                                                                                                                                                            |
| Sun et al, 2010       | ✓                                                                                      | ✓                                                                                                                                       | ✓                                                                       | ✓                                                                                                                         | ✓✓                                                                                                                          | ✓                                                                       | ✓                                               | ✓                                                                                                                                                            |
| Nanri et al, 2010     | ✓                                                                                      | ✓                                                                                                                                       | ✓                                                                       | ✓                                                                                                                         | ✓✓                                                                                                                          | ✓                                                                       | ✓                                               |                                                                                                                                                              |
| Villegas et al, 2007  |                                                                                        |                                                                                                                                         | ✓                                                                       | ✓                                                                                                                         | ✓✓                                                                                                                          |                                                                         | ✓                                               | ✓                                                                                                                                                            |
| Hodge et al, 2004     | ✓                                                                                      | ✓                                                                                                                                       | ✓                                                                       | ✓                                                                                                                         | ✓✓                                                                                                                          |                                                                         | ✓                                               | ✓                                                                                                                                                            |

**eTable 2:** Characteristics of Included Studies Using the Modified Newcastle–Ottawa Scale for Assessing the Quality of the Cross-Sectional Studies

| Study, year          | Selection                                                    |                                           |                                                                         |                                                                                                                             | Comparability                                                                                                               | Outcome                                                                 |                                                                                                                  |
|----------------------|--------------------------------------------------------------|-------------------------------------------|-------------------------------------------------------------------------|-----------------------------------------------------------------------------------------------------------------------------|-----------------------------------------------------------------------------------------------------------------------------|-------------------------------------------------------------------------|------------------------------------------------------------------------------------------------------------------|
|                      | Representativeness of the target population in the community | Justified and satisfactory of sample size | Ascertainment of exposure (validated questionnaire or measurement tool) | Comparability between respondents and non-respondents characteristics is established, and the response rate is satisfactory | Comparability of cohorts on the basis of the design or analysis (study controls for gender and cardiovascular risk factors) | Assessment of outcome (physician’s diagnosis OR objective measurements) | The statistical test used to analyze the data is clearly described and appropriate (included 95% CI and p-value) |
| Song et al, 2014     | ✓                                                            | ✓                                         |                                                                         | ✓                                                                                                                           | ✓✓                                                                                                                          | ✓                                                                       | ✓                                                                                                                |
| Khosravi et al, 2013 | ✓                                                            | ✓                                         | ✓                                                                       | ✓                                                                                                                           | ✓✓                                                                                                                          | ✓                                                                       | ✓                                                                                                                |
| Ahn et al, 2013      | ✓                                                            | ✓                                         | ✓                                                                       | ✓                                                                                                                           | ✓✓                                                                                                                          | ✓                                                                       | ✓                                                                                                                |
| Kim et al, 2008      | ✓                                                            | ✓                                         | ✓                                                                       |                                                                                                                             |                                                                                                                             | ✓                                                                       |                                                                                                                  |

**eTable 3:** Summary of Critical Appraisal of Included Studies Using the Newcastle–Ottawa Scale for Assessing the Quality of Observational Studies

| Study, year           | Stars, n  |               |         | total | Quality  |
|-----------------------|-----------|---------------|---------|-------|----------|
|                       | Selection | Comparability | Outcome |       |          |
| Muraki et al, 2015    | 4         | 2             | 3       | 9     | High     |
| Dong et al, 2015      | 3         | 1             | 3       | 7     | High     |
| Eshak et al, 2014     | 3         | 1             | 3       | 7     | High     |
| Song et al, 2014      | 3         | 2             | 3       | 7     | High     |
| Bahadoran et al, 2014 | 4         | 2             | 3       | 9     | High     |
| Yu et al, 2013        | 3         | 2             | 2       | 7     | High     |
| Khosravi et al, 2013  | 4         | 2             | 3       | 8     | High     |
| Ahn et al, 2013       | 4         | 2             | 3       | 8     | High     |
| Soriguer et al, 2013  | 4         | 1             | 2       | 7     | High     |
| Eshak et al, 2011     | 4         | 2             | 3       | 9     | High     |
| Yu et al, 2011        | 2         | 1             | 2       | 5     | Moderate |
| Liang et al, 2010     | 4         | 2             | 1       | 7     | High     |
| Oba et al, 2010       | 3         | 2             | 2       | 7     | High     |
| Sun et al, 2010       | 4         | 2             | 3       | 9     | High     |
| Nanri et al, 2010     | 4         | 2             | 2       | 8     | High     |
| Kim et al, 2008       | 2         | 0             | 2       | 4     | Moderate |
| Villegas et al, 2007  | 2         | 2             | 2       | 6     | Moderate |
| Hodge et al, 2004     | 4         | 2             | 2       | 8     | High     |

a: maximum 4 stars

b: maximum 2 stars

c: maximum 3 stars

**eTable 4:** Adjustment factors, validation of measurement, and assessment of outcomes for included studies

|                       | <b>Adjusted for</b>                                                                                                                                                                                                                                                                                                                                                       | <b>Validation of measurement (correlation coefficients)</b>    | <b>Category</b>                                                           | <b>Assessment of outcomes</b>                                                                                                              |
|-----------------------|---------------------------------------------------------------------------------------------------------------------------------------------------------------------------------------------------------------------------------------------------------------------------------------------------------------------------------------------------------------------------|----------------------------------------------------------------|---------------------------------------------------------------------------|--------------------------------------------------------------------------------------------------------------------------------------------|
| Muraki et al, 2015    | Gender, ethnicity, family history of MI, HTN, hypercholesterolemia, T2DM, BMI, physical activity, cigarette smoking, alcohol intake, multivitamin use, menopausal status and postmenopausal hormone use (for women), oral contraceptive use (for NHSII only), current aspirin use, total energy intake, and the modified aHEI score                                       | 0.57 (using multiple-day diet records as the reference method) | >5 servings/wk vs < 1 serving/wk                                          | World Health Organization criteria for MI or the National Survey of Stroke criteria for stroke                                             |
| Dong et al, 2015      | Age, gender, education, urbanicity, HTN, total physical activity, total energy intake, dietary pattern scores, BMI, fiber intakes, magnesium intakes, fat intake, smoking, alcohol intake, and income (low/medium/high)                                                                                                                                                   | 0.56 (men) and 0.60 (women)                                    | Highest vs. Lowest tertiles                                               | Diabetes was classified using fasting blood glucose (FBG) $\geq 7.0$ mmol/l                                                                |
| Bahadoran et al, 2014 | Age, gender, BMI, total energy intake, carbohydrate, protein and fiber intake                                                                                                                                                                                                                                                                                             | 0.59 (men) and 0.60 (women)                                    | Highest vs. Lowest quartiles                                              | NCEP ATP III for MetS                                                                                                                      |
| Song et al, 2014      | Age, living area (urban or rural), education (elementary, junior high, senior high, or college or more), smoking status, current alcohol intake, vigorous physical activity, and total energy intake                                                                                                                                                                      | None mentioned                                                 | Highest vs. Lowest quartiles                                              | NCEP ATP III for MetS with a modified waist circumference cutoff for Korean adults                                                         |
| Eshak et al, 2014     | Age, gender, PHC, history of HTN, T2DM, the use of a lipid-lowering drug, BMI, smoking status, ethanol intake, leisure-time sports activity, quintiles of energy- adjusted dietary intakes of selected foods and nutrients (seafood, meat, fruit, vegetables, soy, SFAs, and sodium), total caloric intake. Menopausal status and postmenopausal hormone use (for women). | 0.79 (men) and 0.71 (women)                                    | Highest vs. Lowest quartiles                                              | The criteria of the Monitoring Trends and Determinants of Cardiovascular Disease Project and the criteria of the National Survey of Stroke |
| Yu et al, 2013        | Educational level, income level, cigarette smoking, alcohol consumption, physical activity level, waist-to-hip ratio, history of HTN, and dietary intakes of total energy, saturated fat, and protein                                                                                                                                                                     | 0.65 (2nd FFQ vs 24-h recalls) and 0.48 (1st FFQ vs 2nd FFQ)   | Highest vs. Lowest quartiles                                              | World Health Organization criteria for MI                                                                                                  |
| Khosravi et al, 2013  | Age, gender, education, marriage, income, smoking, and physical activity, and BMI                                                                                                                                                                                                                                                                                         | None mentioned                                                 | White rice consumption of $\leq 7$ times per week vs. 7-14 times per week | NCEP ATP III for MetS<br>FBS $\geq 126$ mg/dL or glucose 2hpp $\geq 200$ mg/dL or using drug for diabetes for T2DM                         |
| Ahn et al, 2013       | Age, gender, total energy intake, education level, supplement use, exercise, drinking, and smoking                                                                                                                                                                                                                                                                        | 0.45 (two FFQs 1 year apart)                                   | Pure white rice vs. white rice with multi grains or beans                 | NCEP ATP III for MetS                                                                                                                      |
| Soriguer et al, 2013  | Age, gender, obesity, the presence of IFG or IGT, exercise, and educational level.                                                                                                                                                                                                                                                                                        | Not mentioned                                                  | Once or less or more than one a week                                      | 1998 World Health Organization criteria for T2DM                                                                                           |
| Eshak et al, 2011     | Age, history of HTN, history of T2DM, BMI, smoking status, current smoker, alcohol consumption, hours of exercise, hours of walking, perceived mental stress, education level, sleep                                                                                                                                                                                      | 0.63 (the FFQ and four 3-d dietary record were 0.63)           | Highest vs. Lowest quartiles                                              | International Statistical Classification of Diseases and Related Health Problems, 10th revised edition (ICD-10).                           |

|                      |                                                                                                                                                                                                                                                                                                                                                     |                                                              |                              |                                                                                                                                                                                                                |
|----------------------|-----------------------------------------------------------------------------------------------------------------------------------------------------------------------------------------------------------------------------------------------------------------------------------------------------------------------------------------------------|--------------------------------------------------------------|------------------------------|----------------------------------------------------------------------------------------------------------------------------------------------------------------------------------------------------------------|
|                      | duration, fish, fruit, vegetable, meat, milk and dairy products, soy, total energy intake, sodium intake and Key's dietary score                                                                                                                                                                                                                    |                                                              |                              |                                                                                                                                                                                                                |
| Yu et al, 2011       | Age, sex, BMI, waist-to-hip ratio, current smoking status, alcohol intake, participation in exercise/sports and family history of diabetes                                                                                                                                                                                                          | Validated, but no correlation provided                       | Comparison (g/week)          | The WHO Study Group (1998) criteria                                                                                                                                                                            |
| Liang et al, 2010    | Age, gender, weight, height, education level, smoking status/pack-years, and alcohol drinking status                                                                                                                                                                                                                                                | Not mentioned                                                | Case vs control              | sudden onset of a focal neurologic event, with symptoms lasting 24 hours and subsequent confirmation of brain infarct by computed tomography or magnetic resonance imaging, and no previous history of stroke. |
| Oba et al, 2010      | Age, BMI, smoking status, physical activity, reported history of HTN; education, intake of total energy, alcohol, dietary fiber, salt, and total fat                                                                                                                                                                                                | FFQ and 12-day food record – 0.34 (men) and 0.45 (women)     | Highest vs. Lowest quartiles | Classification of Diseases and Related Health Problems, 10th revised edition (ICD-10)                                                                                                                          |
| Sun et al, 2010      | Age, ethnicity, BMI, smoking status, alcohol intake, multivitamin use, physical activity, and family history of T2DM, total energy intake and intake of red meat, fruits, vegetables, coffee, and whole grains, oral contraceptive use (NHSII participants only), postmenopausal status, and hormone use (for nurses)                               | 0.53 (FFQ and with diet record Assessments)                  | Highest vs. Lowest quintiles | The criteria from the National Diabetes Data Group to confirm self-reported diagnosis of T2DM.                                                                                                                 |
| Nanri et al, 2010    | Age, study area, BMI, smoking habit with a consumption of either < 20 or >20 cigarettes/d, alcohol consumption, total physical activity level, history of HTN, family history of T2DM, occupation, total energy intake, coffee consumption, calcium intake, magnesium intake, dietary fiber intake, fruit intake, vegetable intake, and fish intake | 0.67 (men) and 0.55 (women)                                  | Highest vs. Lowest quartiles | Self-reported diabetes and confirmed by medical records                                                                                                                                                        |
| Kim et al, 2008      | Age, education years, smoking status, BMI, alcohol intake, HTN, T2DM, family history of T2DM and myocardial infarction, leisure-time physical activity and energy intake                                                                                                                                                                            | 0.47 (multiple 24 h recalls) 0.41 (between two FFQ)          | Highest vs. Lowest quintiles | NCEP ATP III for MetS                                                                                                                                                                                          |
| Villegas et al, 2007 | Age, level of educational achievement, WHR, BMI, physical activity categories family income in yuan per year, the exchange rate for the US dollar at the time, occupation, smoking status, alcohol consumption, non-occupational physical activity, and hypertension diagnosis                                                                      | 0.65 (2nd FFQ vs 24-h recalls) and 0.48 (1st FFQ vs 2nd FFQ) | Highest vs. Lowest quintiles | Criteria as recommended by the American Diabetes Association                                                                                                                                                   |
| Hodge et al, 2004    | Age, country of birth, sex, physical activity score, weight change, education level, alcohol intake, and family history of T2DM, energy intake, BMI and WHR                                                                                                                                                                                         | None mentioned                                               | Highest vs. Lowest quartiles | World Health Organization criteria for T2DM                                                                                                                                                                    |

**Abbreviations:** HTN: hypertension; T2DM: type 2 diabetes; MetS: metabolic syndrome; AHEI score: alternate healthy eating index; IFG: impaired fasting glucose; IGT: impaired glucose tolerance; BMI: body mass index; WHR: waist-to-hip ratio; NCEP ATP III: National Cholesterol Education Program - Adult Treatment Panel III; FFQ: Food Frequency Questionnaires; PHC: Personal health care

**eTable 5:** Leave-one-out analysis for coronary heart disease, stroke, metabolic syndrome and type 2 diabetes

| <b>Study be omitted <u>coronary heart disease</u></b> | <b>RR</b> | <b>95% CI</b> | <b>P-value</b> |
|-------------------------------------------------------|-----------|---------------|----------------|
| Overall                                               | 0.99      | (0.79, 1.24)  | 0.912          |
| Omitting Muraki et al (CAD), 2015                     | 1.07      | (0.79, 1.46)  | 0.657          |
| Omitting Eshak et al (IHD), 2014                      | 0.98      | (0.73, 1.31)  | 0.887          |
| Omitting Yu et al (M), 2013                           | 0.92      | (0.76, 1.12)  | 0.407          |
| Omitting Yu et al (F), 2013                           | 0.96      | (0.76, 1.22)  | 0.741          |
| Omitting Eshak et al (M), 2011                        | 1.07      | (0.84, 1.36)  | 0.612          |
| Omitting Eshak et al (F), 2011                        | 0.98      | (0.76, 1.28)  | 0.902          |

| <b>Study be omitted <u>stroke</u></b>     | <b>RR</b> | <b>95% CI</b> | <b>P-value</b> |
|-------------------------------------------|-----------|---------------|----------------|
| Overall                                   | 0.96      | (0.89, 1.04)  | 0.339          |
| Omitting Muraki et al (Ischemic), 2015    | 0.98      | (0.90, 1.06)  | 0.590          |
| Omitting Muraki et al (Hemorrhagic), 2015 | 0.98      | (0.90, 1.06)  | 0.590          |
| Omitting Eshak et al (Hemorrhagic), 2014  | 0.96      | (0.88, 1.05)  | 0.416          |

|                                       |      |              |       |
|---------------------------------------|------|--------------|-------|
| Omitting Eshak et al (Ischemic), 2014 | 0.95 | (0.87, 1.03) | 0.234 |
| Omitting Eshak et al (M), 2011        | 0.96 | (0.87, 1.07) | 0.505 |
| Omitting Eshak et al (F), 2011        | 0.96 | (0.86, 1.07) | 0.486 |
| Omitting Liang et al, 2010            | 0.96 | (0.92, 1.01) | 0.104 |
| Omitting Oba et al (M), 2010          | 0.96 | (0.89, 1.05) | 0.389 |
| Omitting Oba et al (F), 2010          | 0.96 | (0.89, 1.04) | 0.302 |

| <b>Study be omitted <u>metabolic syndrome</u></b> | <b>RR</b> | <b>95% CI</b> | <b>P-value</b> |
|---------------------------------------------------|-----------|---------------|----------------|
| Overall                                           | 1.30      | (1.03, 1.65)  | 0.027          |
| Omitting Bahadoran et al, 2014                    | 1.25      | (0.98, 1.59)  | 0.072          |
| Omitting Song et al, 2014                         | 1.18      | (0.95, 1.46)  | 0.128          |
| Omitting Ahn et al, 2013                          | 1.45      | (1.04, 2.01)  | 0.028          |
| Omitting Khosravi et al, 2013                     | 1.32      | (1.02, 1.72)  | 0.036          |
| Omitting Kim, Kirang et al (M), 2008              | 1.27      | (1.00, 1.61)  | 0.047          |
| Omitting Kim, Kirang et al (F), 2008              | 1.26      | (0.99, 1.59)  | 0.056          |

| <b>Study be omitted <u>type 2 diabetes</u></b> | <b>RR</b> | <b>95% CI</b> | <b>P-value</b> |
|------------------------------------------------|-----------|---------------|----------------|
| Overall                                        | 1.10      | (0.91, 1.32)  | 0.326          |
| Omitting Dong et al, 2015                      | 1.15      | (0.95, 1.39)  | 0.141          |
| Omitting Khosravi et al, 2013                  | 1.10      | (0.91, 1.33)  | 0.340          |
| Omitting Soriguer et al, 2013                  | 1.14      | (0.95, 1.37)  | 0.159          |
| Omitting Yu et al, 2011                        | 1.13      | (0.92, 1.38)  | 0.251          |
| Omitting Nanri et al (W), 2010                 | 1.06      | (0.88, 1.29)  | 0.542          |
| Omitting Nanri et al (M), 2010                 | 1.09      | (0.89, 1.33)  | 0.426          |
| Omitting Sun et al (HPFS), 2010                | 1.10      | (0.90, 1.36)  | 0.353          |
| Omitting Sun et al (NHS I), 2010               | 1.09      | (0.88, 1.35)  | 0.416          |
| Omitting Sun et al (NHS II), 2010              | 1.06      | (0.87, 1.30)  | 0.549          |
| Omitting Villegas et al, 2007                  | 1.04      | (0.89, 1.21)  | 0.579          |
| Omitting Hodge et al, 2004                     | 1.10      | (0.88, 1.38)  | 0.402          |

**eFigure 1:** White rice consumption and coronary heart disease and type 2 diabetes mellitus in Western countries

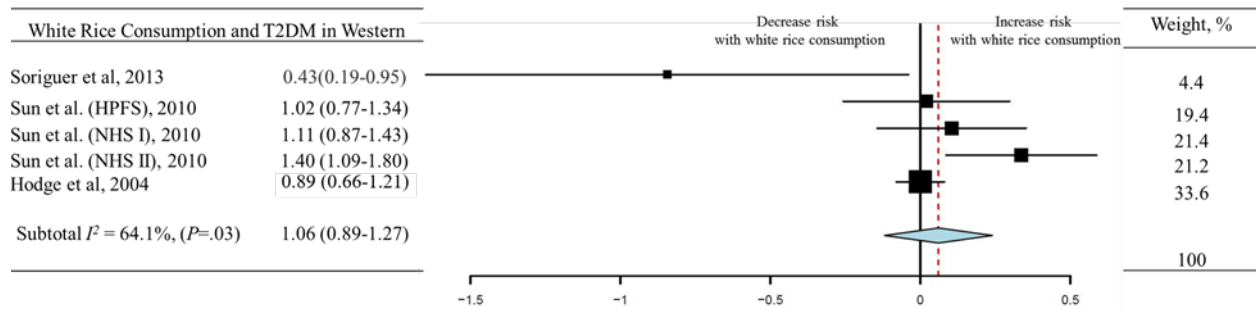



## eMethods: Search Strategies

### Ovid

Database(s): Embase 1988 to 2016 Week 09, Ovid MEDLINE(R) In-Process & Other Non-Indexed Citations and Ovid MEDLINE(R) 1946 to Present, EBM Reviews - Cochrane Central Register of Controlled Trials January 2016

Search Strategy:

| #  | Searches                                                                                                                                                                                                                                                                                                                                                                                                                                                                                                                                                                                                                                                                                                                                                                                                                                                 | Results |
|----|----------------------------------------------------------------------------------------------------------------------------------------------------------------------------------------------------------------------------------------------------------------------------------------------------------------------------------------------------------------------------------------------------------------------------------------------------------------------------------------------------------------------------------------------------------------------------------------------------------------------------------------------------------------------------------------------------------------------------------------------------------------------------------------------------------------------------------------------------------|---------|
| 1  | exp Cardiovascular Diseases/<br>(((endocardial or subendocardial or angiocardiovascular or cardiovascular or heart or cardiac or cardial or coronary or vascular or myocardial or myocardium or myocard or pericardial or vasculitic or vessel* or aorta or aortic or arteriovenous or artery or arteries or arterial or vein or veins or cerebrovascular) adj3 (anomaly or anomalies or abnormalit* or defect or defects or disease* or complication* or disorder* or disturbance* or infection* or inflammation* or lesion* or malformation* or symptom* or syndrome* or event* or deficiency or deformity or dysfunction* or ischemia* or ischaemia* or ischemic or ischaemic or insufficienc*)) or "angina pectoris" or arteriosclerosis or atherosclerosis or "cardiac allograft vasculopath*" or "cardiac arrest" or "cardiac backward failure"    | 4781250 |
| 2  | or "cardiac death" or "cardiac decompensation" or "Cardiac Failure" or "cardiac incompetence" or "cardiac infarct*" or "cardiac stand still" or "cardiac sudden death" or "cardial decompensation" or "cardial infarct*" or cardiomyopathy or cardiopath* or "coronary artery constriction*" or "coronary artery obstruction*" or "coronary artery thrombos*" or "decompensatio cordis" or "heart attack" or "heart backward failure" or "heart death" or "Heart Decompensation" or "heart failure" or "heart incompetence" or "heart infarct*" or "heart micro infarct*" or "heart muscle infarct*" or "insufficiencia cordis" or "Kounis syndrome" or "Myocardial Failure" or "myocardial hibernation" or "Myocardial Infarct*" or "myocardium infarct*" or "no reflow phenomenon" or "premonitory infarction sign*" or "subendocardial infarct*").mp. | 2994876 |
| 3  | exp Stroke/                                                                                                                                                                                                                                                                                                                                                                                                                                                                                                                                                                                                                                                                                                                                                                                                                                              | 218816  |
| 4  | exp cerebrovascular accident/                                                                                                                                                                                                                                                                                                                                                                                                                                                                                                                                                                                                                                                                                                                                                                                                                            | 218816  |
| 5  | exp Cerebrovascular Disorders/                                                                                                                                                                                                                                                                                                                                                                                                                                                                                                                                                                                                                                                                                                                                                                                                                           | 705944  |
| 6  | (((cerebral or brain) adj3 (insult or insultus or accident* or "blood flow disturbance*" or infarct* or ischem* or ischaem*)) or apoplexia or apoplexy or "cerebral vascular*" or cerebrovascular* or "cerebrum vascular*" or "ischaemic seizure*" or "ischemic seizure*" or stroke or strokes).mp.                                                                                                                                                                                                                                                                                                                                                                                                                                                                                                                                                      | 819685  |
| 7  | exp diabetes mellitus/                                                                                                                                                                                                                                                                                                                                                                                                                                                                                                                                                                                                                                                                                                                                                                                                                                   | 972684  |
| 8  | (diabetes or iddm or niddm).mp.                                                                                                                                                                                                                                                                                                                                                                                                                                                                                                                                                                                                                                                                                                                                                                                                                          | 1173678 |
| 9  | 7 or 8                                                                                                                                                                                                                                                                                                                                                                                                                                                                                                                                                                                                                                                                                                                                                                                                                                                   | 1235140 |
| 10 | or/1-9                                                                                                                                                                                                                                                                                                                                                                                                                                                                                                                                                                                                                                                                                                                                                                                                                                                   | 6154709 |
| 11 | exp Oryza sativa/                                                                                                                                                                                                                                                                                                                                                                                                                                                                                                                                                                                                                                                                                                                                                                                                                                        | 47982   |

|                                                                                                                                                                                                                                                                                                                                                                                                                                                                                                                                                                                                                                                                                                                                                                                                                                                                                                                                                                                                                                                                                                                                                                                                                                                                                                                                                                                                                                                                                                                                                                                        |          |
|----------------------------------------------------------------------------------------------------------------------------------------------------------------------------------------------------------------------------------------------------------------------------------------------------------------------------------------------------------------------------------------------------------------------------------------------------------------------------------------------------------------------------------------------------------------------------------------------------------------------------------------------------------------------------------------------------------------------------------------------------------------------------------------------------------------------------------------------------------------------------------------------------------------------------------------------------------------------------------------------------------------------------------------------------------------------------------------------------------------------------------------------------------------------------------------------------------------------------------------------------------------------------------------------------------------------------------------------------------------------------------------------------------------------------------------------------------------------------------------------------------------------------------------------------------------------------------------|----------|
| 12 ("oryza sativa" or rice).mp.                                                                                                                                                                                                                                                                                                                                                                                                                                                                                                                                                                                                                                                                                                                                                                                                                                                                                                                                                                                                                                                                                                                                                                                                                                                                                                                                                                                                                                                                                                                                                        | 76267    |
| 13 11 or 12                                                                                                                                                                                                                                                                                                                                                                                                                                                                                                                                                                                                                                                                                                                                                                                                                                                                                                                                                                                                                                                                                                                                                                                                                                                                                                                                                                                                                                                                                                                                                                            | 78293    |
| 14 10 and 13                                                                                                                                                                                                                                                                                                                                                                                                                                                                                                                                                                                                                                                                                                                                                                                                                                                                                                                                                                                                                                                                                                                                                                                                                                                                                                                                                                                                                                                                                                                                                                           | 2552     |
| 15 exp controlled study/                                                                                                                                                                                                                                                                                                                                                                                                                                                                                                                                                                                                                                                                                                                                                                                                                                                                                                                                                                                                                                                                                                                                                                                                                                                                                                                                                                                                                                                                                                                                                               | 5000389  |
| 16 exp Randomized Controlled Trial/                                                                                                                                                                                                                                                                                                                                                                                                                                                                                                                                                                                                                                                                                                                                                                                                                                                                                                                                                                                                                                                                                                                                                                                                                                                                                                                                                                                                                                                                                                                                                    | 786928   |
| 17 exp triple blind procedure/                                                                                                                                                                                                                                                                                                                                                                                                                                                                                                                                                                                                                                                                                                                                                                                                                                                                                                                                                                                                                                                                                                                                                                                                                                                                                                                                                                                                                                                                                                                                                         | 119      |
| 18 exp Double-Blind Method/                                                                                                                                                                                                                                                                                                                                                                                                                                                                                                                                                                                                                                                                                                                                                                                                                                                                                                                                                                                                                                                                                                                                                                                                                                                                                                                                                                                                                                                                                                                                                            | 366545   |
| 19 exp Single-Blind Method/                                                                                                                                                                                                                                                                                                                                                                                                                                                                                                                                                                                                                                                                                                                                                                                                                                                                                                                                                                                                                                                                                                                                                                                                                                                                                                                                                                                                                                                                                                                                                            | 57607    |
| 20 exp latin square design/                                                                                                                                                                                                                                                                                                                                                                                                                                                                                                                                                                                                                                                                                                                                                                                                                                                                                                                                                                                                                                                                                                                                                                                                                                                                                                                                                                                                                                                                                                                                                            | 323      |
| 21 exp Placebos/                                                                                                                                                                                                                                                                                                                                                                                                                                                                                                                                                                                                                                                                                                                                                                                                                                                                                                                                                                                                                                                                                                                                                                                                                                                                                                                                                                                                                                                                                                                                                                       | 293727   |
| 22 exp Placebo Effect/                                                                                                                                                                                                                                                                                                                                                                                                                                                                                                                                                                                                                                                                                                                                                                                                                                                                                                                                                                                                                                                                                                                                                                                                                                                                                                                                                                                                                                                                                                                                                                 | 8592     |
| 23 exp comparative study/                                                                                                                                                                                                                                                                                                                                                                                                                                                                                                                                                                                                                                                                                                                                                                                                                                                                                                                                                                                                                                                                                                                                                                                                                                                                                                                                                                                                                                                                                                                                                              | 2566447  |
| 24 exp Cohort Studies/                                                                                                                                                                                                                                                                                                                                                                                                                                                                                                                                                                                                                                                                                                                                                                                                                                                                                                                                                                                                                                                                                                                                                                                                                                                                                                                                                                                                                                                                                                                                                                 | 1849096  |
| 25 longitudinal study/                                                                                                                                                                                                                                                                                                                                                                                                                                                                                                                                                                                                                                                                                                                                                                                                                                                                                                                                                                                                                                                                                                                                                                                                                                                                                                                                                                                                                                                                                                                                                                 | 183609   |
| 26 exp prospective study/                                                                                                                                                                                                                                                                                                                                                                                                                                                                                                                                                                                                                                                                                                                                                                                                                                                                                                                                                                                                                                                                                                                                                                                                                                                                                                                                                                                                                                                                                                                                                              | 796380   |
| 27 exp observational study/                                                                                                                                                                                                                                                                                                                                                                                                                                                                                                                                                                                                                                                                                                                                                                                                                                                                                                                                                                                                                                                                                                                                                                                                                                                                                                                                                                                                                                                                                                                                                            | 103560   |
| 28 exp clinical trial/                                                                                                                                                                                                                                                                                                                                                                                                                                                                                                                                                                                                                                                                                                                                                                                                                                                                                                                                                                                                                                                                                                                                                                                                                                                                                                                                                                                                                                                                                                                                                                 | 1747881  |
| 29 clinical study/                                                                                                                                                                                                                                                                                                                                                                                                                                                                                                                                                                                                                                                                                                                                                                                                                                                                                                                                                                                                                                                                                                                                                                                                                                                                                                                                                                                                                                                                                                                                                                     | 69901    |
| 30 exp case-control studies/                                                                                                                                                                                                                                                                                                                                                                                                                                                                                                                                                                                                                                                                                                                                                                                                                                                                                                                                                                                                                                                                                                                                                                                                                                                                                                                                                                                                                                                                                                                                                           | 877895   |
| 31 exp confidence interval/                                                                                                                                                                                                                                                                                                                                                                                                                                                                                                                                                                                                                                                                                                                                                                                                                                                                                                                                                                                                                                                                                                                                                                                                                                                                                                                                                                                                                                                                                                                                                            | 137863   |
| 32 exp regression analysis/                                                                                                                                                                                                                                                                                                                                                                                                                                                                                                                                                                                                                                                                                                                                                                                                                                                                                                                                                                                                                                                                                                                                                                                                                                                                                                                                                                                                                                                                                                                                                            | 648166   |
| 33 exp proportional hazards model/                                                                                                                                                                                                                                                                                                                                                                                                                                                                                                                                                                                                                                                                                                                                                                                                                                                                                                                                                                                                                                                                                                                                                                                                                                                                                                                                                                                                                                                                                                                                                     | 115242   |
| 34 exp multivariate analysis/<br>((control* adj3 study) or (control* adj3 trial) or (randomized adj3 study) or<br>(randomized adj3 trial) or (randomised adj3 study) or (randomised adj3 trial) or<br>"pragmatic clinical trial" or (doubl* adj blind*) or (doubl* adj mask*) or (singl*<br>adj blind*) or (singl* adj mask*) or (tripl* adj blind*) or (tripl* adj mask*) or<br>(trebl* adj blind*) or (trebl* adj mask*) or "latin square" or placebo* or nocebo*<br>or multivariate or "comparative study" or "comparative survey" or "comparative<br>analysis" or cohort* or "longitudinal study" or "longitudinal survey" or<br>"longitudinal analysis" or "longitudinal evaluation" or longitudinal* or<br>"prospective study" or "prospective survey" or "prospective analysis" or<br>prospectiv* or "incidence study" or "incidence survey" or "incidence analysis" or<br>(("follow-up" or followup) adj (stud* or survey or analysis)) or ((observation or<br>observational) adj (study or survey or analysis)) or "case study" or "case series" or<br>"clinical series" or "case studies" or "clinical study" or "clinical trial" or "case<br>control study" or "case base study" or "case referent study" or "case referent<br>study" or "case referent study" or "case compeer study" or "case comparison<br>study" or "matched case control" or "multicenter study" or "multi-center study" or<br>"odds ratio" or "confidence interval" or "regression analysis" or "least square" or<br>"least squares" or (hazard* adj (model or analys* or regression)) or "Cox model" | 405537   |
| 35                                                                                                                                                                                                                                                                                                                                                                                                                                                                                                                                                                                                                                                                                                                                                                                                                                                                                                                                                                                                                                                                                                                                                                                                                                                                                                                                                                                                                                                                                                                                                                                     | 12865408 |

or "Cox multivariate analyses" or "Cox multivariate analysis" or "Cox regression" or "Cox survival analyses" or "Cox survival analysis" or "Cox survival model" or "change analysis").mp.pt.

36 or/15-35 13368094

37 14 and 36 1238

38 (exp animals/ or exp nonhuman/) not exp humans/ 8292978  
 ((alpaca or alpacas or amphibian or amphibians or animal or animals or antelope or armadillo or armadillos or avian or baboon or baboons or beagle or beagles or bee or bees or bird or birds or bison or bovine or buffalo or buffaloes or buffalos or "c elegans" or "Caenorhabditis elegans" or camel or camels or canine or canines or carp or cats or cattle or chick or chicken or chickens or chicks or chimp or chimpanze or chimpanzees or chimps or cow or cows or "D melanogaster" or "dairy calf" or "dairy calves" or deer or dog or dogs or donkey or donkeys or drosophila or "Drosophila melanogaster" or duck or duckling or ducklings or ducks or equid or equids or equine or equines or feline or felines or ferret or ferrets or finch or finches or fish or flatworm or flatworms or fox or foxes or frog or frogs or "fruit flies" or "fruit fly" or "G mellonella" or "Galleria mellonella" or geese or gerbil or gerbils or goat or goats or goose or gorilla or gorillas or hamster

39 or hamsters or hare or hares or heifer or heifers or horse or horses or insect or 7271649  
 insects or jellyfish or kangaroo or kangaroos or kitten or kittens or lagomorph or lagomorphs or lamb or lambs or llama or llamas or macaque or macaques or macaw or macaws or marmoset or marmosets or mice or minipig or minipigs or mink or minks or monkey or monkeys or mouse or mule or mules or nematode or nematodes or octopus or octopuses or orangutan or "orang-utan" or orangutans or "orang-utans" or oxen or parrot or parrots or pig or pigeon or pigeons or piglet or piglets or pigs or porcine or primate or primates or quail or rabbit or rabbits or rat or rats or reptile or reptiles or rodent or rodents or ruminant or ruminants or salmon or sheep or shrimp or slug or slugs or swine or tamarin or tamarins or toad or toads or trout or urchin or urchins or vole or voles or waxworm or waxworms or worm or worms or xenopus or "zebra fish" or zebrafish) not (human or humans)).mp.

40 37 not (38 or 39) 1004

41 40 not "conference abstract".pt. 902  
 limit 41 to (editorial or erratum or letter or note or addresses or autobiography or bibliography or biography or comment or dictionary or directory or interactive tutorial or interview or lectures or legal cases or legislation or news or newspaper

42 article or overall or patient education handout or periodical index or portraits or 15  
 published erratum or video-audio media or webcasts) [Limit not valid in Embase,Ovid MEDLINE(R),Ovid MEDLINE(R) In-Process,CCTR; records were retained]

43 41 not 42 887

44 limit 43 to yr="1966 -Current" 887

45 remove duplicates from 44 570

## Scopus

- 1 TITLE-ABS-KEY(((endocardial or subendocardial or angiocardiovascular or cardiovascular or heart or cardiac or cardial or coronary or vascular or myocardial or myocardium or myocard or pericardial or vasculitic or vessel\* or aorta or aortic or arteriovenous or artery or arteries or arterial or vein or vein or veins or cerebrovascular) W/3 (anomaly or anomalies or abnormalit\* or defect or defects or disease\* or complication\* or disorder\* or disturbance\* or infection\* or inflammation\* or lesion\* or malformation\* or symptom\* or syndrome\* or event\* or deficiency or deformity or dysfunction\* or ischemia\* or ischaemia\* or ischemic or ischaemic or insufficienc\*)) OR "angina pectoris" OR arteriosclerosis OR atherosclerosis OR "cardiac allograft vasculopath\*" OR "cardiac arrest" OR "cardiac backward failure" OR "cardiac death" OR "cardiac decompensation" OR "Cardiac Failure" OR "cardiac incompetence" OR "cardiac infarct\*" OR "cardiac stand still" OR "cardiac sudden death" OR "cardial decompensation" OR "cardial infarct\*" OR cardiomyopathy OR cardiopath\* OR "coronary artery constriction\*" OR "coronary artery obstruction\*" OR "coronary artery thrombos\*" OR "decompensatio cordis" OR "heart attack" OR "heart backward failure" OR "heart death" OR "Heart Decompensation" OR "heart failure" OR "heart incompetence" OR "heart infarct\*" OR "heart micro infarct\*" OR "heart muscle infarct\*" OR "insufficiencia cordis" OR "Kounis syndrome" OR "Myocardial Failure" OR "myocardial hibernation" OR "Myocardial Infarct\*" OR "myocardium infarct\*" OR "no reflow phenomenon" OR "premonitory infarction sign\*" OR "subendocardial infarct\*")
- 2 TITLE-ABS-KEY (((cerebral or brain) W/3 (insult or insultus or accident\* or "blood flow disturbance\*" or infarct\* or ischem\* or ischaem\*)) or apoplexia or apoplexy or "cerebral vascular\*" or cerebrovascular\* or "cerebrum vascular\*" or "ischaemic seizure\*" or "ischemic seizure\*" or stroke or strokes)
- 3 TITLE-ABS-KEY(diabetes or iddm or niddm)
- 4 TITLE-ABS-KEY("oryza sativa" OR rice)
- 5 TITLE-ABS-KEY((control\* W/3 study) OR (control\* W/3 trial) OR (randomized W/3 study) OR (randomized W/3 trial) OR (randomised W/3 study) OR (randomised W/3 trial) OR "pragmatic clinical trial" OR (doubl\* W/1 blind\*) OR (doubl\* W/1 mask\*) OR (singl\* W/1 blind\*) OR (singl\* W/1 mask\*) OR (tripl\* W/1 blind\*) OR (tripl\* W/1 mask\*) OR (trebl\* W/1 blind\*) OR (trebl\* W/1 mask\*) OR "latin square" OR placebo\* OR nocebo\* OR multivariate OR "comparative study" OR "comparative survey" OR "comparative analysis" OR cohort\* OR "longitudinal study" OR "longitudinal survey" OR "longitudinal analysis" OR "longitudinal evaluation" OR longitudinal\* OR "prospective study" OR "prospective survey" OR "prospective analysis" OR prospectiv\* OR "incidence study" OR "incidence survey" OR "incidence analysis" OR (("follow-up" or followup) W/1 (stud\* or survey or analysis)) OR ((observation or observational) W/1 (study or survey or analysis)) OR

"case study" OR "case series" OR "clinical series" OR "case studies" OR "clinical study" OR "clinical trial" OR "case control study" OR "case base study" OR "case referent study" OR "case referent study" OR "case referent study" OR "case compeer study" OR "case comparison study" OR "matched case control" OR "multicenter study" OR "multi-center study" OR "odds ratio" OR "confidence interval" OR "regression analysis" OR "least square" or "least squares" OR (hazard\* W/1 (model OR analys\* OR regression)) OR "Cox model" OR "Cox multivariate analyses" OR "Cox multivariate analysis" OR "Cox regression" OR "Cox survival analyses" OR "Cox survival analysis" OR "Cox survival model" OR "change analysis")

6 PUBYEAR AFT 1965

7 (1 or 2 or 3) and 4 and 5 and 6

8 TITLE-ABS-KEY((alpaca OR alpacas OR amphibian OR amphibians OR animal OR animals OR antelope OR armadillo OR armadillos OR avian OR baboon OR baboons OR beagle OR beagles OR bee OR bees OR bird OR birds OR bison OR bovine OR buffalo OR buffaloes OR buffalos OR "c elegans" OR "Caenorhabditis elegans" OR camel OR camels OR canine OR canines OR carp OR cats OR cattle OR chick OR chicken OR chickens OR chicks OR chimp OR chimpanze OR chimpanzees OR chimps OR cow OR cows OR "D melanogaster" OR "dairy calf" OR "dairy calves" OR deer OR dog OR dogs OR donkey OR donkeys OR drosophila OR "Drosophila melanogaster" OR duck OR duckling OR ducklings OR ducks OR equid OR equids OR equine OR equines OR feline OR felines OR ferret OR ferrets OR finch OR finches OR fish OR flatworm OR flatworms OR fox OR foxes OR frog OR frogs OR "fruit flies" OR "fruit fly" OR "G mellonella" OR "Galleria mellonella" OR geese OR gerbil OR gerbils OR goat OR goats OR goose OR gorilla OR gorillas OR hamster OR hamsters OR hare OR hares OR heifer OR heifers OR horse OR horses OR insect OR insects OR jellyfish OR kangaroo OR kangaroos OR kitten OR kittens OR lagomorph OR lagomorphs OR lamb OR lambs OR llama OR llamas OR macaque OR macaques OR macaw OR macaws OR marmoset OR marmosets OR mice OR minipig OR minipigs OR mink OR minks OR monkey OR monkeys OR mouse OR mule OR mules OR nematode OR nematodes OR octopus OR octopuses OR orangutan OR "orang-utan" OR orangutans OR "orang-utans" OR oxen OR parrot OR parrots OR pig OR pigeon OR pigeons OR piglet OR piglets OR pigs OR porcine OR primate OR primates OR quail OR rabbit OR rabbits OR rat OR rats OR reptile OR reptiles OR rodent OR rodents OR ruminant OR ruminants OR salmon OR sheep OR shrimp OR slug OR slugs OR swine OR tamarin OR tamarins OR toad OR toads OR trout OR urchin OR urchins OR vole OR voles OR waxworm OR waxworms OR worm OR worms OR xenopus OR "zebra fish" OR zebrafish) AND NOT (human OR humans))

9 7 and not 8

- 10 DOCTYPE(le) OR DOCTYPE(ed) OR DOCTYPE(bk) OR DOCTYPE(er) OR DOCTYPE(no) OR DOCTYPE(sh)
- 11 9 and not 10
- 12 PMID(0\*) OR PMID(1\*) OR PMID(2\*) OR PMID(3\*) OR PMID(4\*) OR PMID(5\*) OR PMID(6\*) OR PMID(7\*) OR PMID(8\*) OR PMID(9\*)
- 13 11 and not 12
